# Supplementary material for: Coarse-Grained Simulations on Polyethylene Crystal Network Formation and Microstructure Analysis
Source: MDPI journal article supplement (doi:10.3390/polym16071007), 2024-04-07
Supplement: s1 [file s1]

# Supporting Information

## Coarse-Grained Simulations on Polyethylene Crystal Network Formation and Microstructure Analysis

Mohammed Althaf Hussain<sup>1,\*</sup>, Takashi Yamamoto<sup>2</sup>, Syed Farooq Adil<sup>3</sup>, and Shigeru Yao<sup>1,\*</sup>

<sup>1</sup> Central Research Institute, Fukuoka University, 8-19-1 Nanakuma, Jonan-Ku, Fukuoka 814-0180, Japan

<sup>2</sup> Graduate School of Science and Engineering, Yamaguchi University, Yamaguchi 753-8512, Japan

<sup>3</sup> Department of Chemistry, College of Science, King Saud University, P.O. Box 2455, Riyadh 11451, Saudi Arabia; sfadil@ksu.edu.sa

\*Correspondence: [altaf.mh7@gmail.com](mailto:altaf.mh7@gmail.com); [shyao@fukuoka-u.ac.jp](mailto:shyao@fukuoka-u.ac.jp)

| Content                                                                                                                                                                                                                                           | Page No. |
|---------------------------------------------------------------------------------------------------------------------------------------------------------------------------------------------------------------------------------------------------|----------|
| <b>Table S1.</b> The density and box dimensions of the 10C <sub>1000</sub> model at each stage of the MD simulations using PYS/R forcefield.                                                                                                      | S2       |
| <b>Figure S1.</b> Potential Energy decomposition of isotropically melting amorphous state at 450K and 1 atm pressure.                                                                                                                             | S3       |
| <b>Figure S2.</b> Amorphous state S-S curves for the 10C <sub>1000</sub> model at 300K and zero pressure conditions using the NPT ensemble. Each model deformed to 500% of the initial box length of the simulation box's X, Y, and Z directions. | S4       |

**Table S1.** The density and box dimensions of the 10C<sub>1000</sub> model at each stage of the MD simulations using PYS/R forcefield.

| Conditions                        | 10C <sub>1000</sub> |             |
|-----------------------------------|---------------------|-------------|
|                                   | $\rho$              | Cell        |
| Data file and NVT melting at 450K | 0.931               | a = 50.0    |
|                                   |                     | b = 50.0    |
|                                   |                     | c = 100.0   |
| NPT Equilibration model at 450K   | 0.769               | a = 53.282  |
|                                   |                     | b = 53.282  |
|                                   |                     | c = 106.564 |
| Quenched model from 450K to 300K  | 0.856               | a = 51.405  |
|                                   |                     | b = 51.405  |
|                                   |                     | c = 102.81  |
| Isothermally cooled at 300K       | 0.913               | a = 50.313  |
|                                   |                     | b = 50.313  |
|                                   |                     | c = 100.626 |

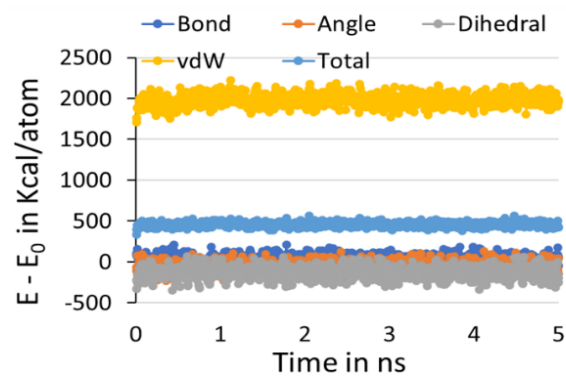

**Figure S1.** Potential energy decomposition of isotropically melting amorphous state at 450K and 1 atm pressure.

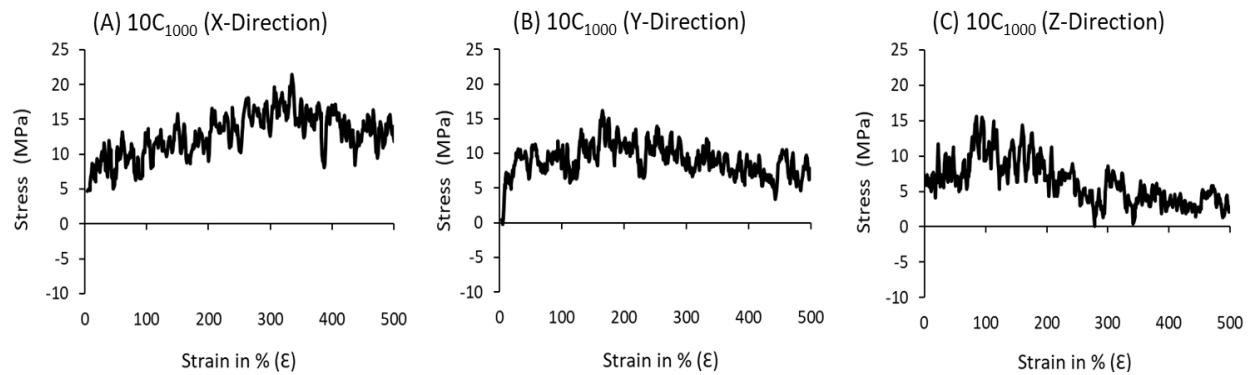

**Figure S2.** Amorphous state S-S curves for the 10C<sub>1000</sub> model at 300K and zero pressure conditions using the NPT ensemble. Each model deformed to 500% of the initial box length of the simulation box's X, Y, and Z directions.
